# Supplementary material for: Prevalence and Characterization of Shiga Toxin Producing Escherichia coli Isolated from Animal Feed in Croatia
Source: MDPI journal article supplement (doi:10.3390/microorganisms10091839), 2022-09-14
Supplement: s1 [file s1]

**Supplementary Materials. Figure S1. Flow diagram of the procedures for isolation and characterization of STEC from feed samples 37 °C ± 1 °C**

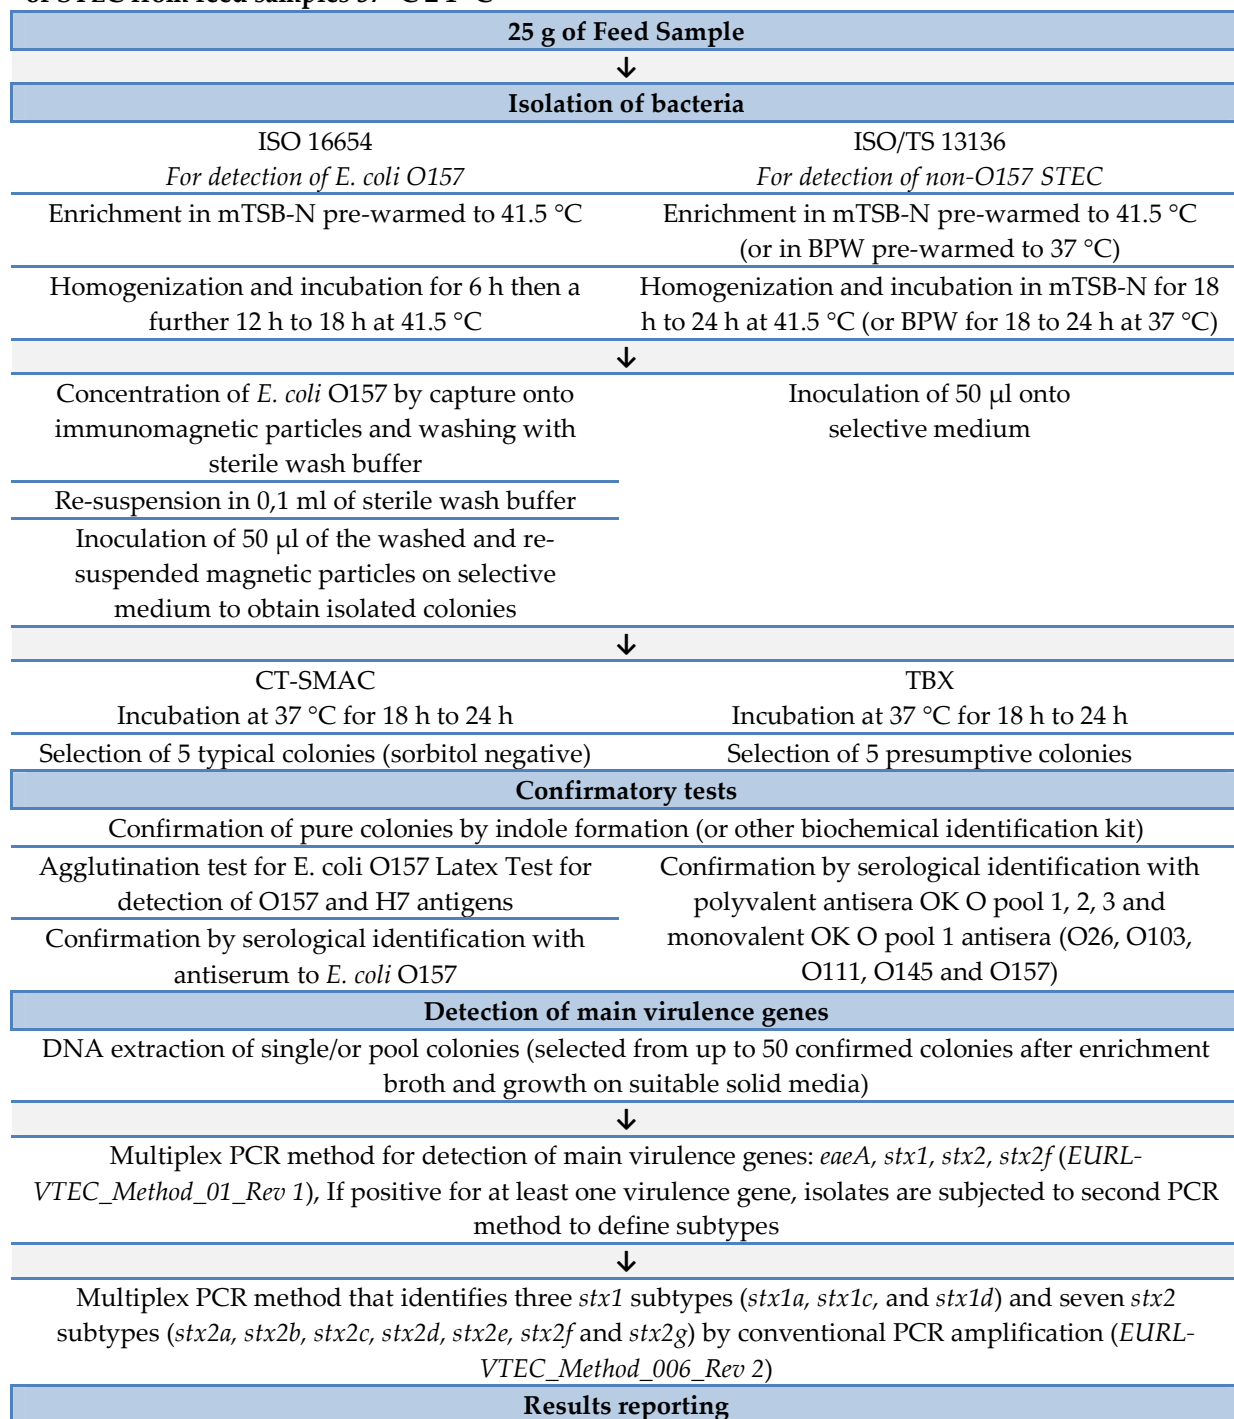

**Notes:** CT-SMAC – Cefixime Tellurite Sorbitol MacConkey Agar; mTSB-N – modified Tryptic Soy Broth with 20 mg/L of Novobiocin; Immunomagnetic particles Dynabeads® anti-*E. coli* O157 (Oxoid or equivalent); TBX – Tryptone Bile X-glucuronide agar, used as second (less) selective media; OK O pool 1 - STEC/EPEC (O26, O103, O111, O145 and O157), 2 - EPEC (O55, O119, O125ac, O127 and O128ab), 3 - EPEC (O86, O114, O121, O126 and O142) antisera (SSI Diagnostica) or equivalent.
